# Supplementary material
Source: Springer Nature journal article supplement (https://www.springermedizin.de/resource/supplementary/13075_2010_3108_MOESM1_ESM.pdf/9693816)

(a)

AS facet joint, anti IL-17

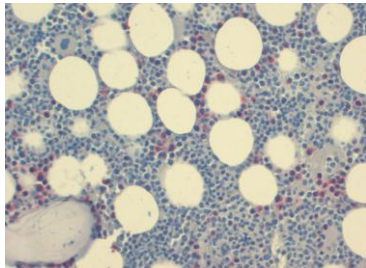

AS facet joint, anti IL-17 + rIL-17

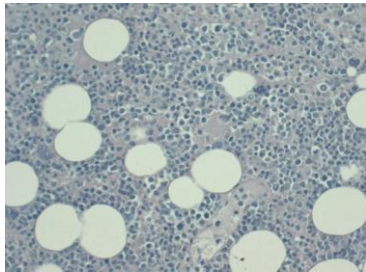

OA facet joint, anti IL-17

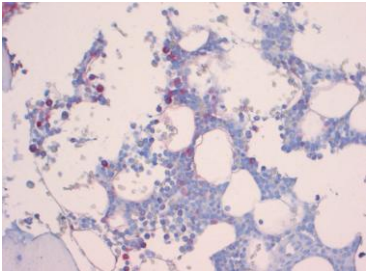

(b)

Mononuclear cells

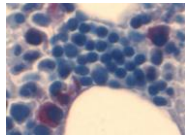

Cells with polysegmental nuclei

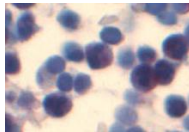

(c)

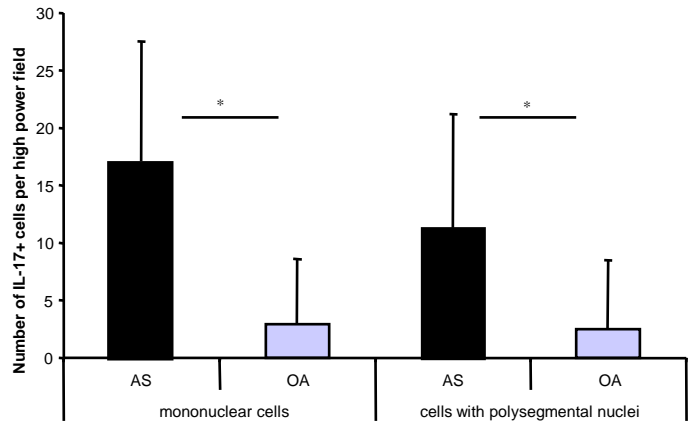

Supplement: MOESM1 [file 9693816]
